# Supplementary material for: The acylfulvene alkylating agent, LP-184, retains nanomolar potency in non-small cell lung cancer carrying otherwise therapy-refractory mutations
Source: PubMed Central journal article supplement (PMC8057270; doi:10.18632/oncotarget.27943), 2021-04-13
Supplement: oncotarget-12-791-s001.pdf [file oncotarget-12-791-s001.pdf]

## The acylfulvene alkylating agent, LP-184, retains nanomolar potency in non-small cell lung cancer carrying otherwise therapy-refractory mutations

### SUPPLEMENTARY MATERIALS

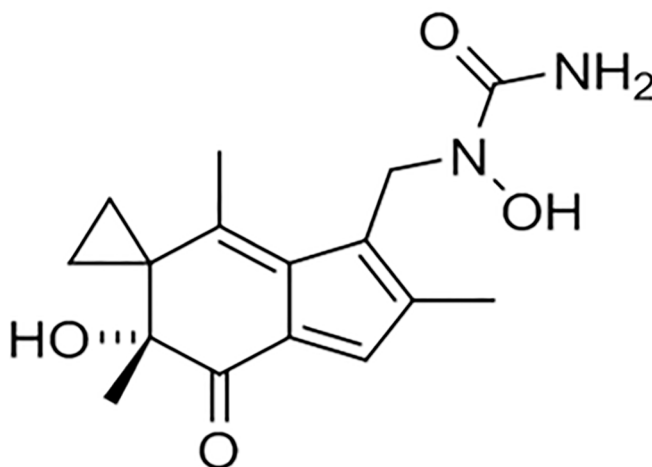

Supplementary Figure 1: LP-184 chemical structure.

LP-184 dose response curve in H2228

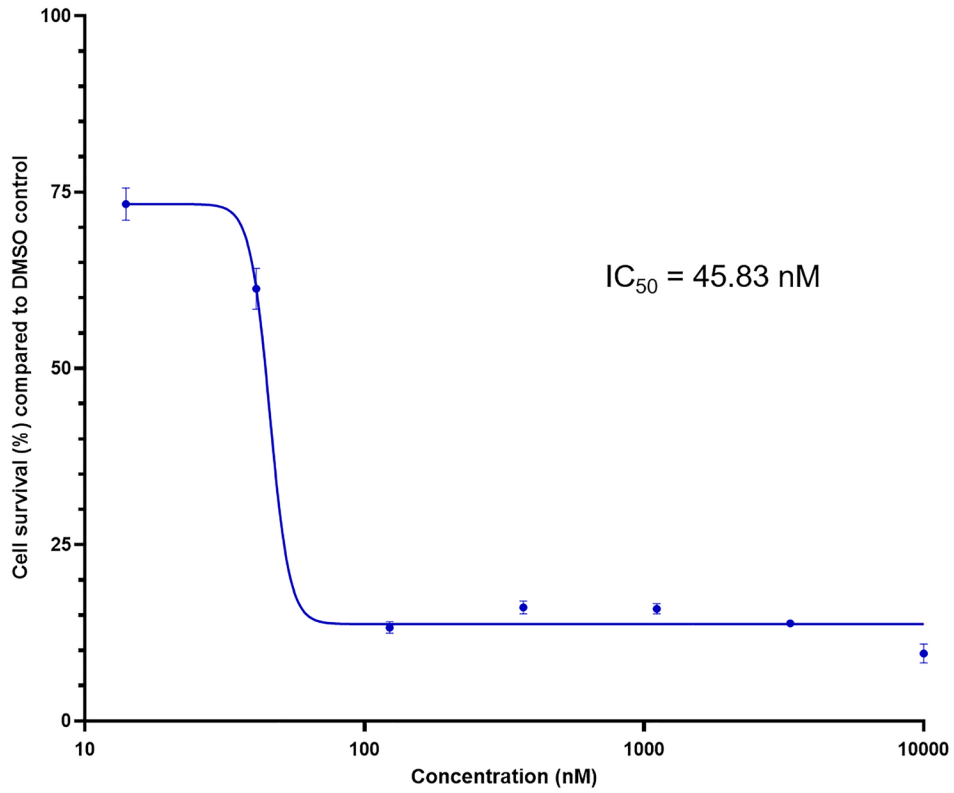

Supplementary Figure 2: LP-184 dose response curve in H2228.

LP-184 dose response curve in H1395

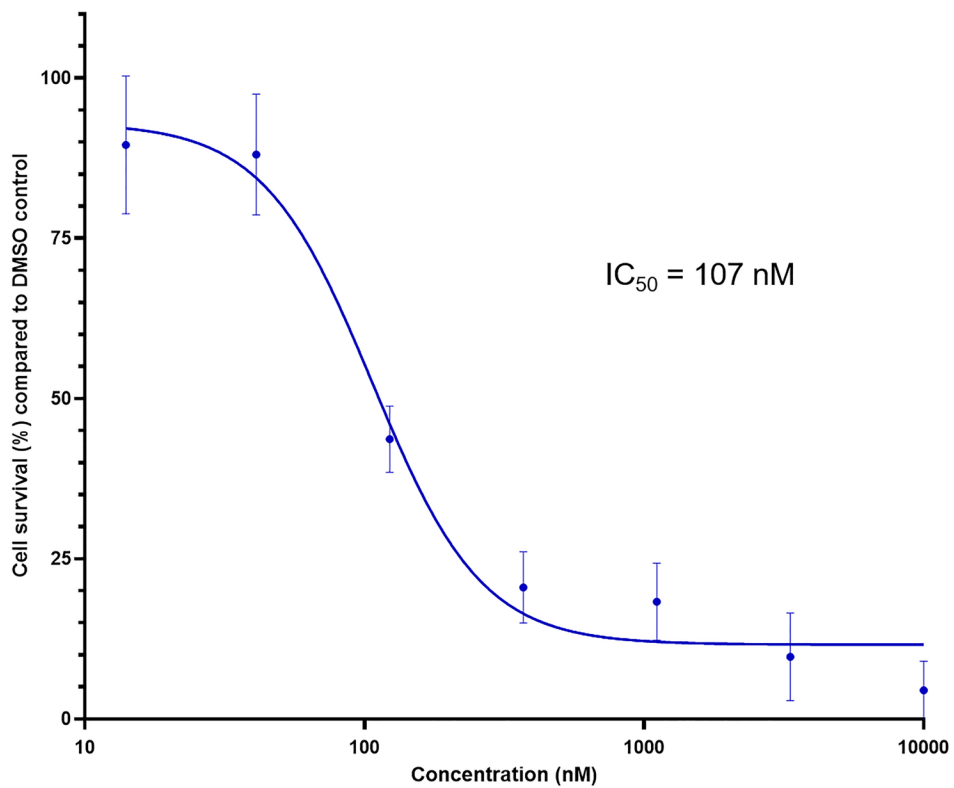

Supplementary Figure 3: LP-184 dose response curve in H1395.

LP-184 dose response curve in H460

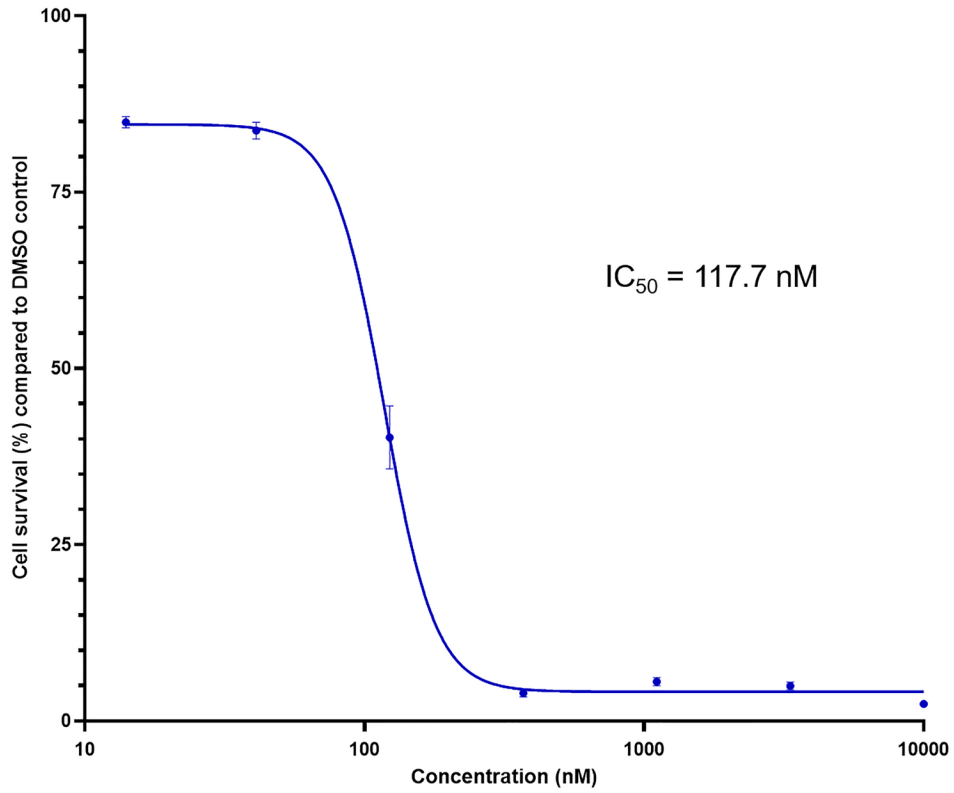

Supplementary Figure 4: LP-184 dose response curve in H460.

LP-184 dose response curve in H1975

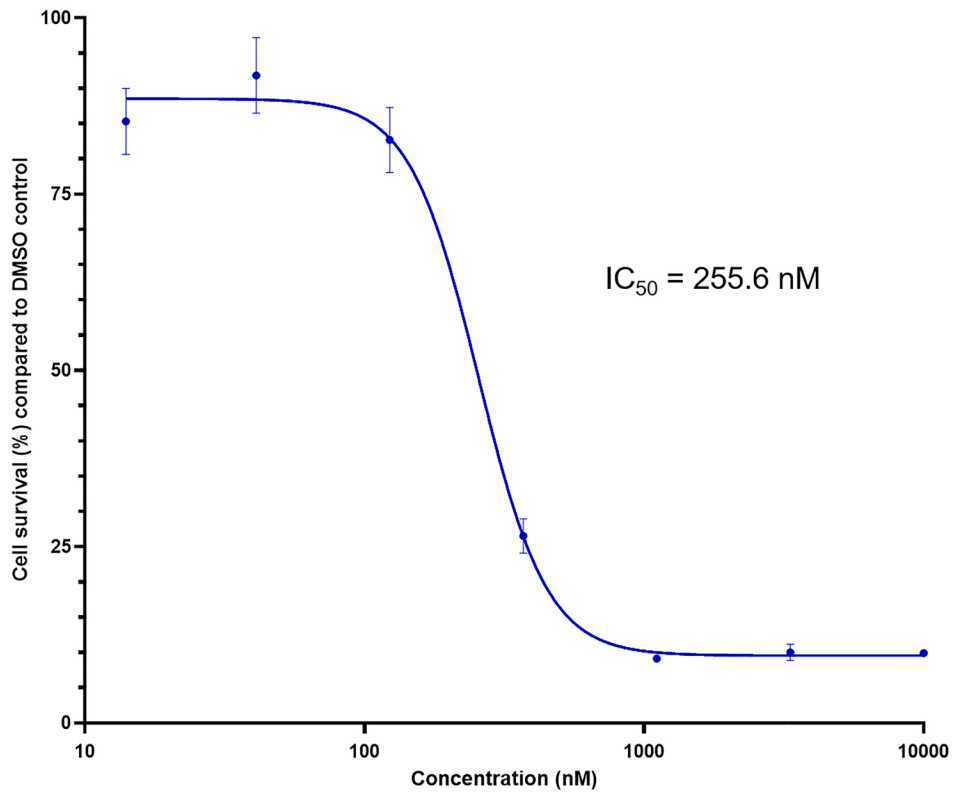

Supplementary Figure 5: LP-184 dose response curve in H1975.

LP-184 dose response curve in H23

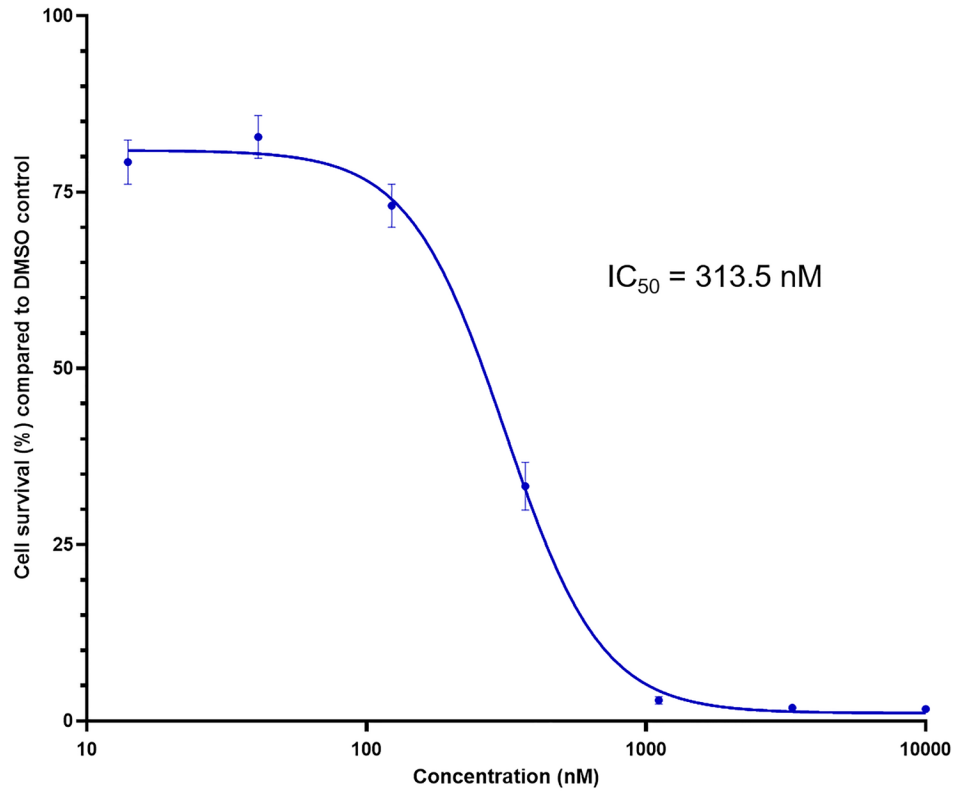

Supplementary Figure 6: LP-184 dose response curve in H23.

LP-184 dose response curve in H1838

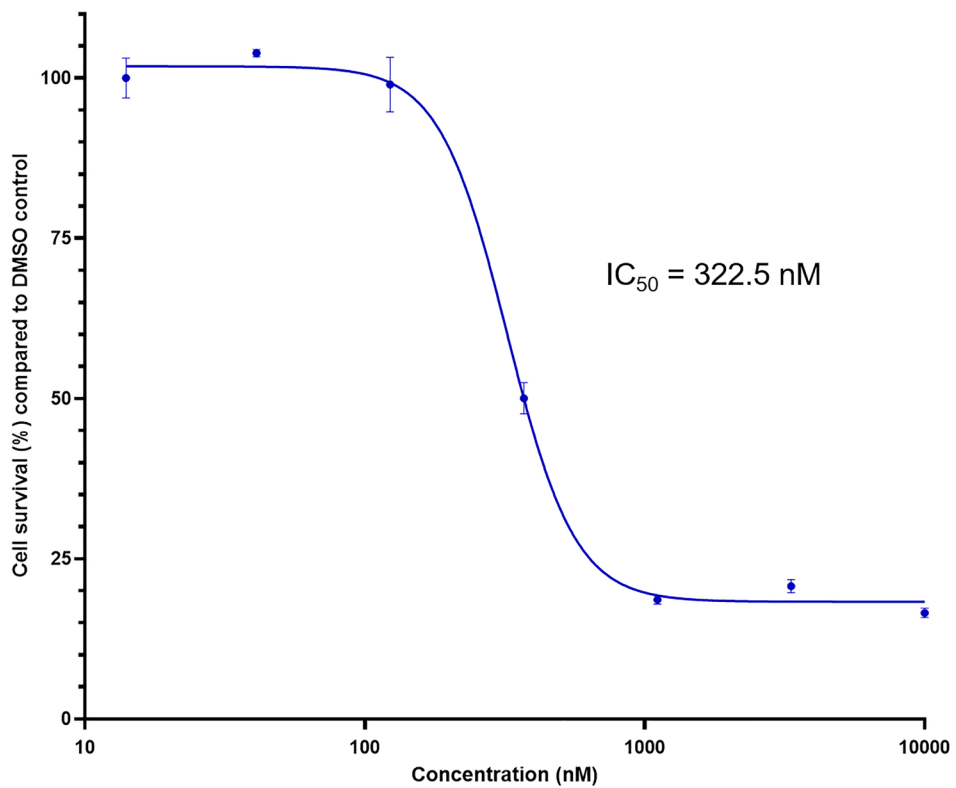

Supplementary Figure 7: LP-184 dose response curve in H1838.

LP-184 dose response curve in HCC827

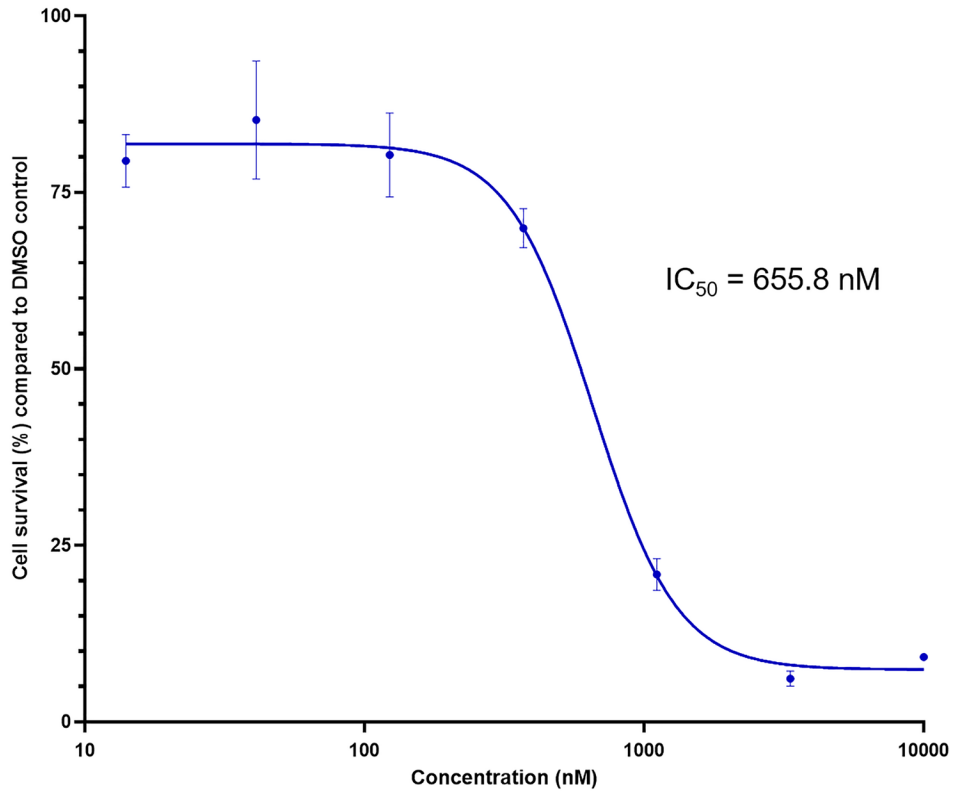

Supplementary Figure 8: LP-184 dose response curve in HCC827.

LP-184 dose response curve in H1666

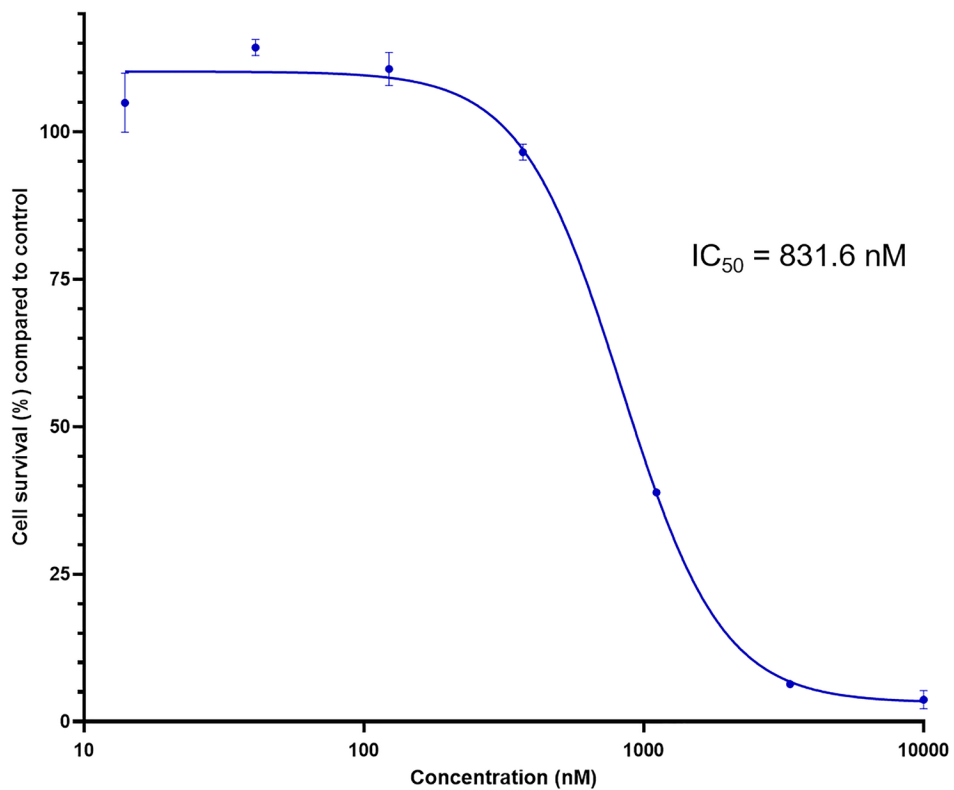

Supplementary Figure 9: LP-184 dose response curve in H1666.

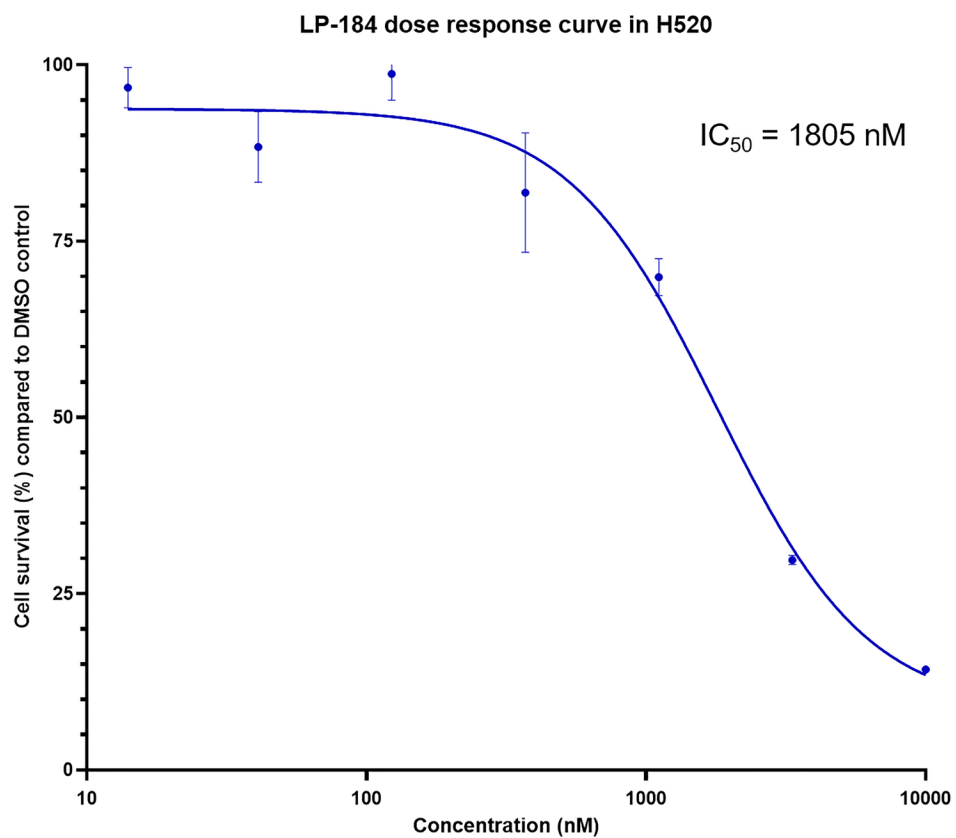

Supplementary Figure 10: LP-184 dose response curve in H520.

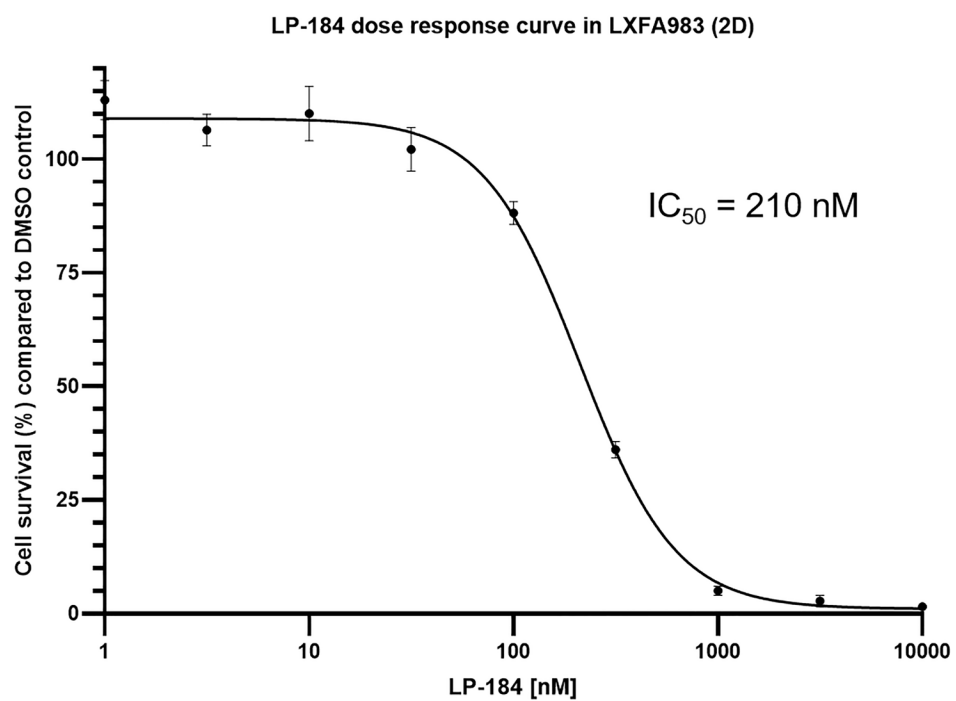

Supplementary Figure 11: LP-184 dose response curve in LXFA983(2D).

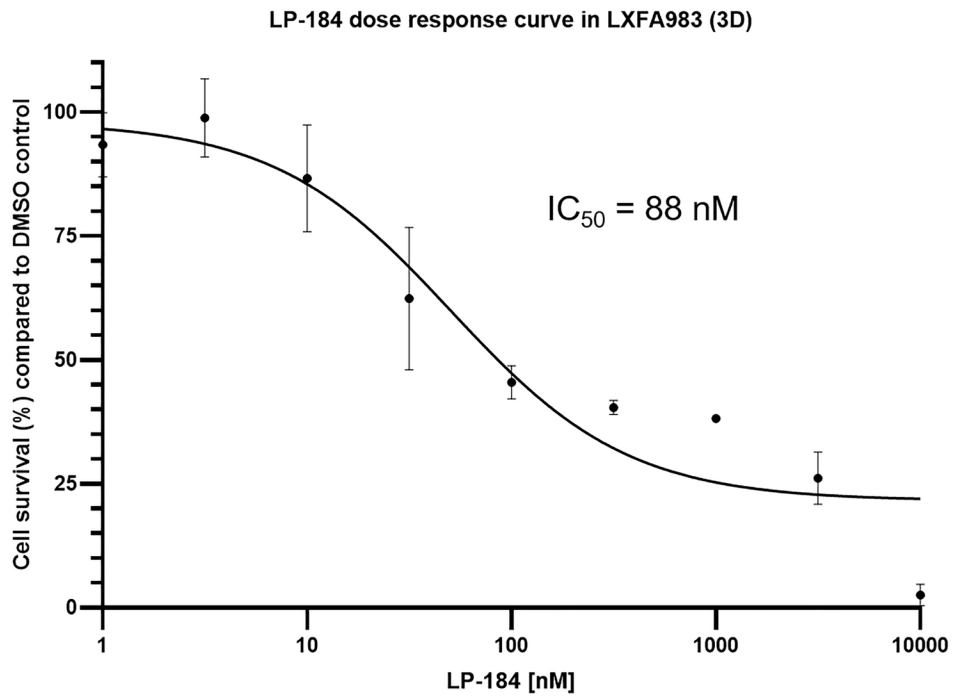

Supplementary Figure 12: LP-184 dose response curve in LXFA983(3D).

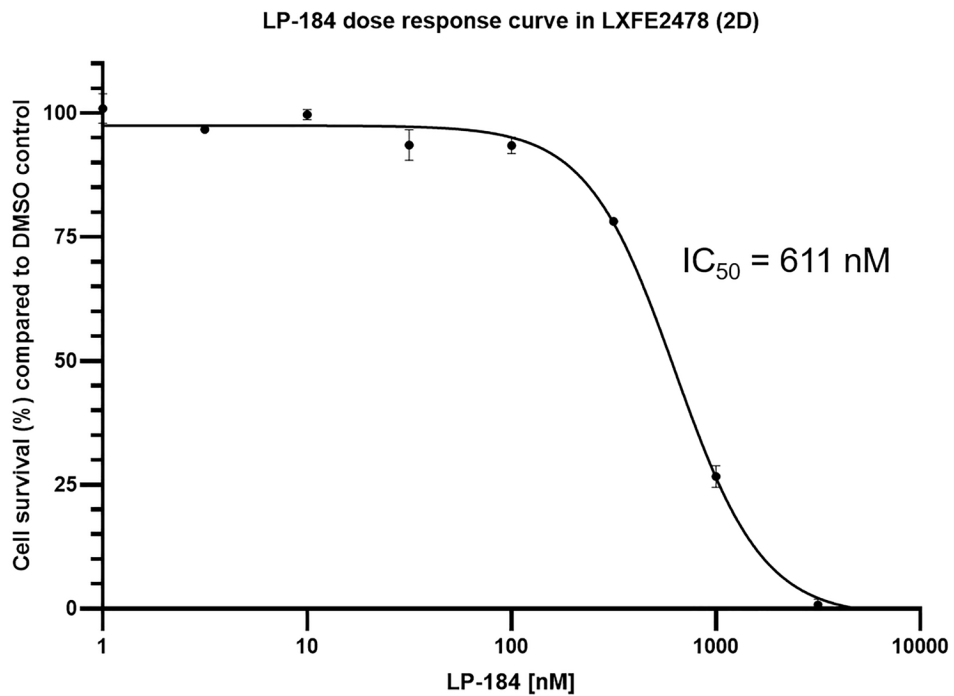

Supplementary Figure 13: LP-184 dose response curve in LXFE2478(2D).

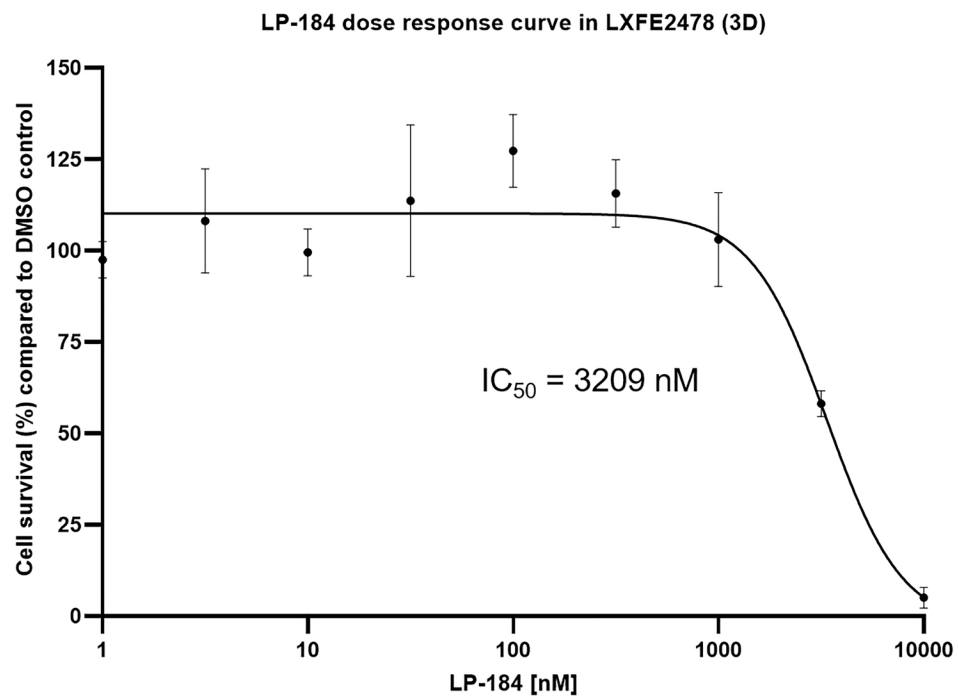

Supplementary Figure 14: LP-184 dose response curve in LXFE2478(3D).



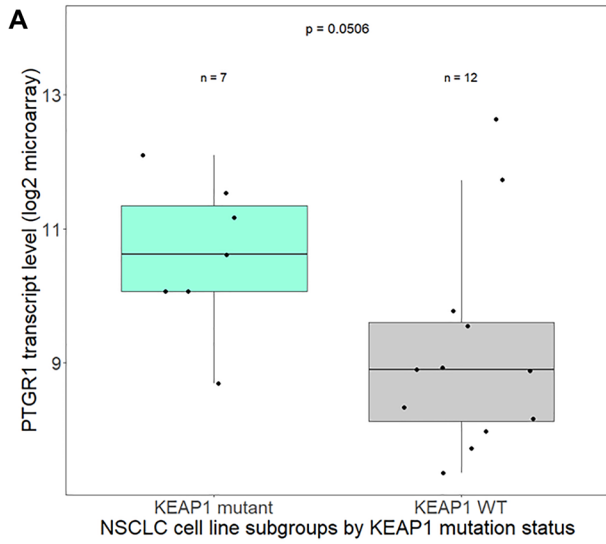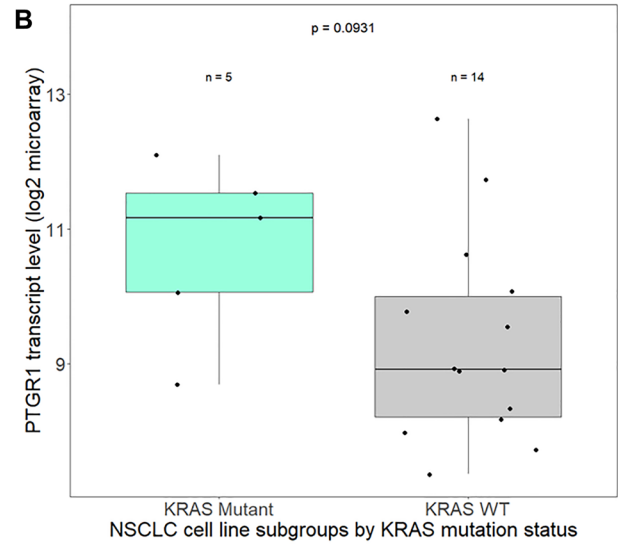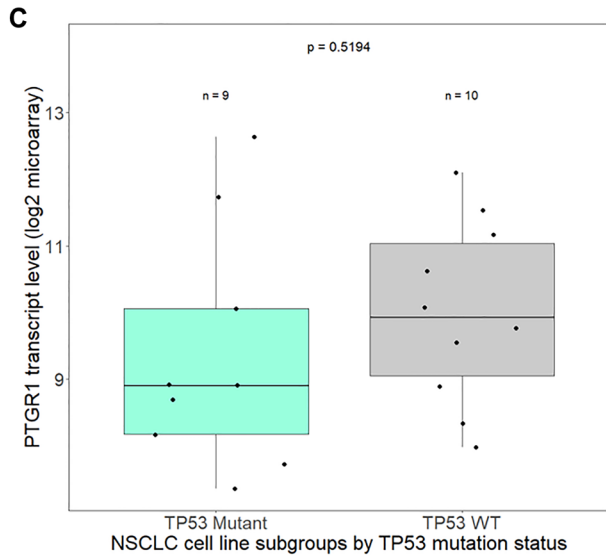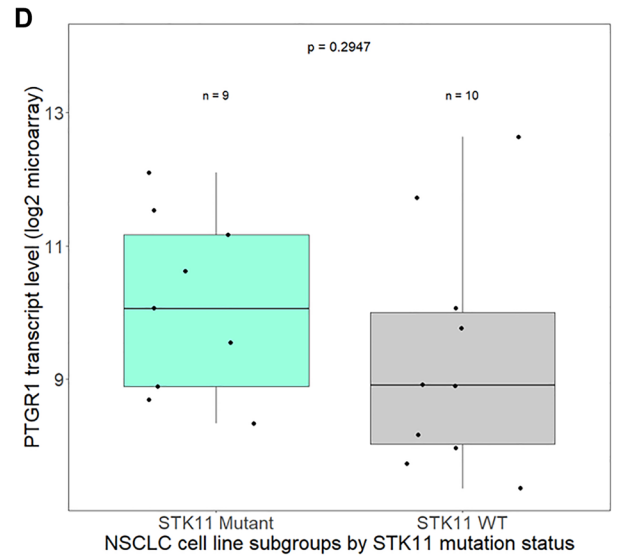

**Supplementary Figure 15: PTGR1 transcript levels in NSCLC cell lines are largely not influenced by mutation status of key oncogenes and tumor suppressors.**

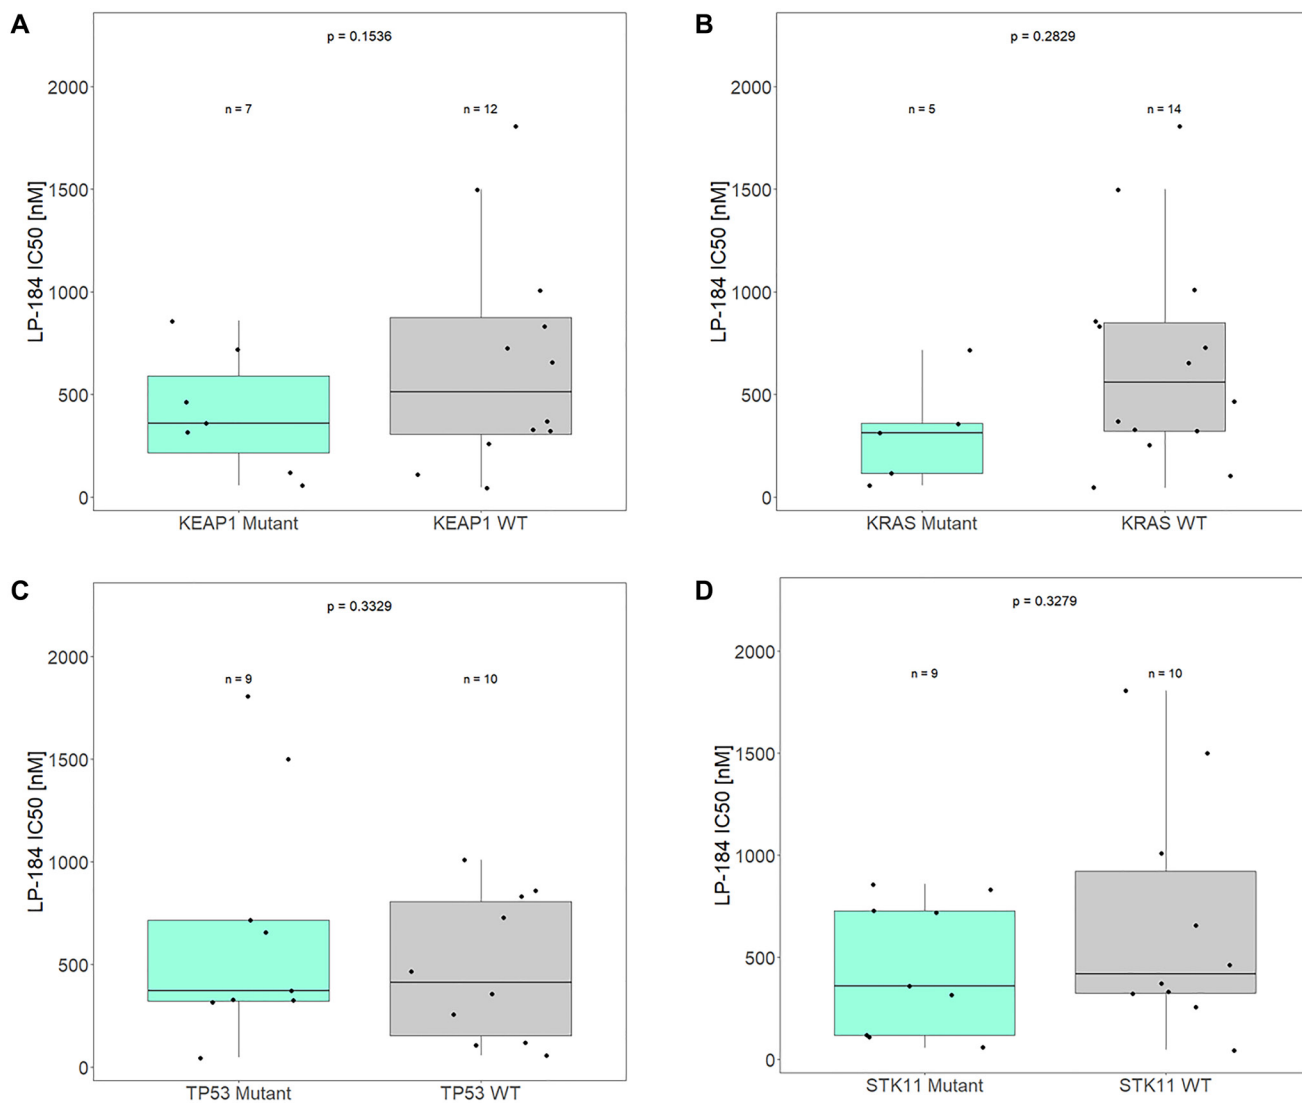

**Supplementary Figure 16: LP-184 sensitivity in cell lines is independent of mutations in key oncogenes and tumor suppressors.** Box plots statistically compare LP-184 sensitivities between cell line groups that are either wild type or mutant for (A) KEAP1 (B) KRAS (C) TP53 and (D) STK11.

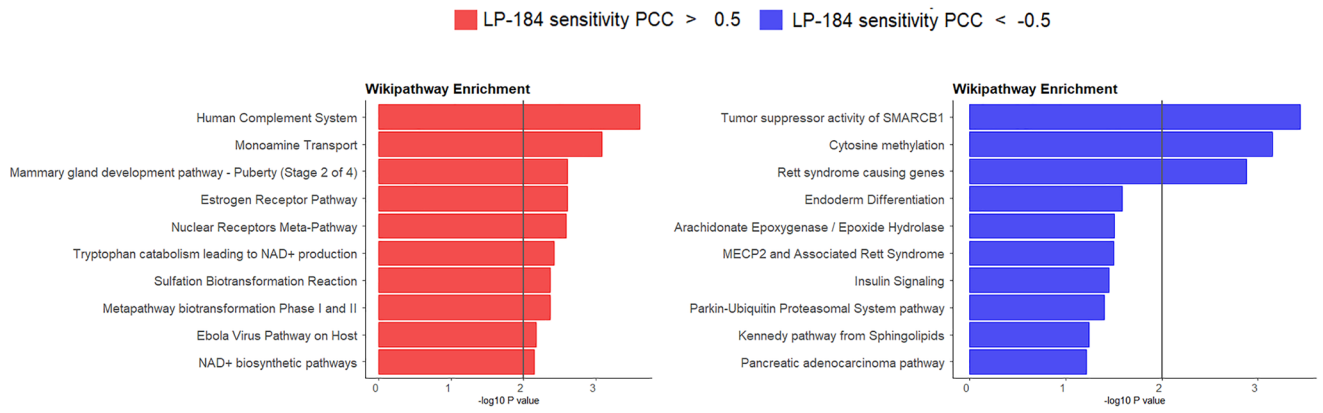

**Supplementary Figure 17: Wikipathway gene enrichment of genes highly correlated with LP-184 sensitivity, in the positive (red) or negative (blue) direction.** *P* values were calculated by Fisher's exact test and shown with bar charts as  $-\log_{10}$  transformations.

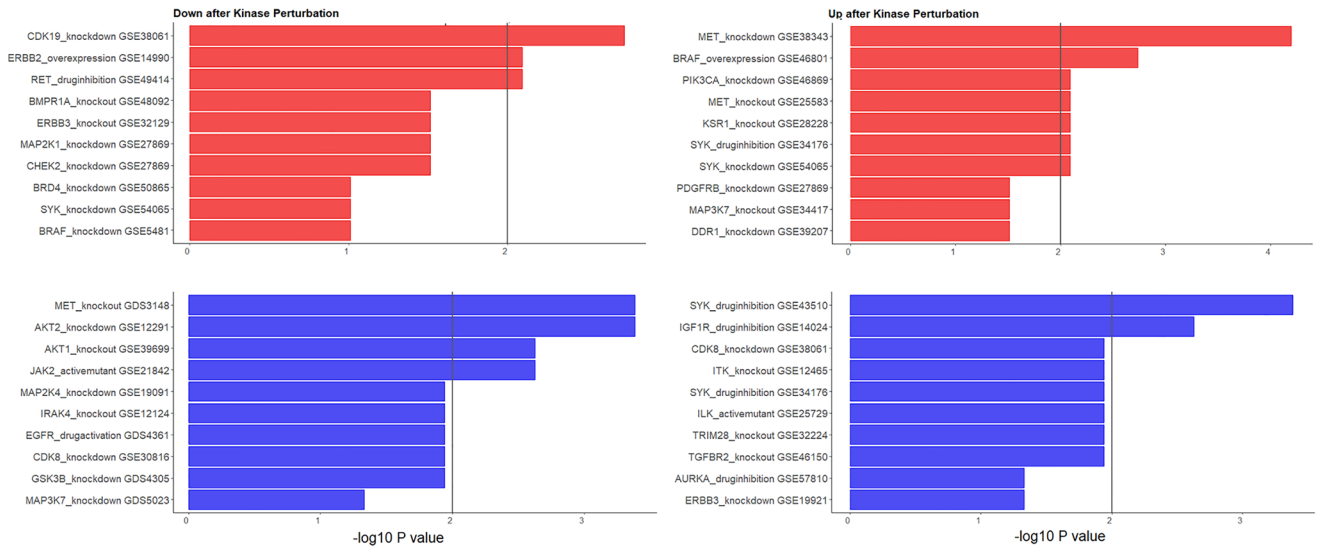

**Supplementary Figure 18: Relationship between LP-184 correlated genes and kinase signaling pathways.** Enrichment performed on the same gene list as in (A), but libraries were composed of genes differentially expressed following kinase gain- or loss-of-function perturbations.

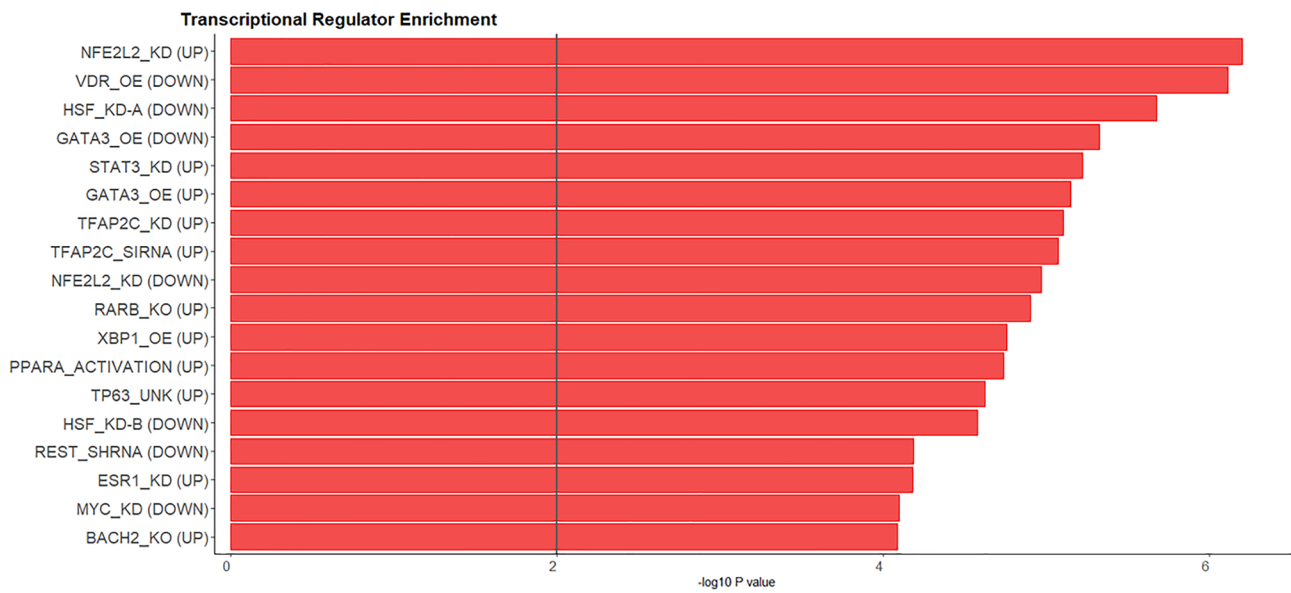

**Supplementary Figure 19: LP-184 response genes associated with transcriptional regulators.** Enrichment performed on the same gene list as in (A), but libraries were composed of genes differentially expressed following transcription factor perturbations.

**Supplementary Table 1: NSCLC cell lines used and their growth conditions**

|           | <b>Cell Line</b> | <b>Base Medium</b> | <b>% of FBS</b> | <b>Freezing Media</b>                         | <b>Subcultivation</b> |
|-----------|------------------|--------------------|-----------------|-----------------------------------------------|-----------------------|
| <b>1</b>  | HCC827           | RPMI-1640          | 10%             | growth medium + 5%DMSO                        | 1:4 to 1:6            |
| <b>2</b>  | H1975            | RPMI-1640          | 10%             | growth medium + 5%DMSO                        | 1:3 to 1:6            |
| <b>3</b>  | H2228            | RPMI-1640          | 10%             | growth medium + 5%DMSO                        | 1:2 to 1:3            |
| <b>4</b>  | H23              | RPMI-1640          | 10%             | growth medium + 5%DMSO                        | 1:3 to 1:6            |
| <b>5</b>  | H460             | RPMI-1640          | 10%             | growth medium + 5%DMSO                        | 1:3 to 1:8            |
| <b>6</b>  | H520             | RPMI-1640          | 10%             | growth medium + 5%DMSO                        | 1:3 to 1:6            |
| <b>7</b>  | H1944            | RPMI-1640          | 10%             | growth medium + 5%DMSO                        | 1:3 to 1:6            |
| <b>8</b>  | H1395            | RPMI-1640          | 10%             | growth medium + 5%DMSO                        | 1:3 to 1:6            |
| <b>9</b>  | H1838            | RPMI-1640          | 10%             | growth medium + 5%DMSO                        | 1:3 to 1:4            |
| <b>10</b> | H1703            | RPMI-1640          | 10%             | growth medium + 5%DMSO                        | 1:3 to 1:6            |
| <b>11</b> | H1563            | RPMI-1640          | 10%             | growth medium + 5%DMSO                        | 1:3 to 1:4            |
| <b>12</b> | H1573            | RPMI-1640          | 5%              | growth medium + 7.5%DMSO                      | 1:2 to 1:3            |
| <b>13</b> | H1435            | RPMI-1640          | 5%              | 85%RPMI + 10%FBS + 5%DMSO                     | 1:3 to 1:6            |
| <b>14</b> | H1648            | RPMI-1640          | 5%              | growth medium + 5%DMSO                        | 1:3 to 1:6            |
| <b>15</b> | H1666            | RPMI-1640          | 5%              | 85%RPMI + 10%FBS + 5%DMSO                     | 1:2 to 1:4            |
| <b>16</b> | A549             | F-12K              | 10%             | growth medium + 5%DMSO                        | 1:3 to 1:8            |
| <b>17</b> | H1793            | DMEM:F12           | 5%              | 85%DMEM/F12 + 10%FBS + 5%DMSO                 | 1:3 to 1:6            |
| <b>18</b> | LC-2/ad          | RPMI-1640:F12      | 10%             | growth medium + 5%DMSO                        | 1:2 to 1:4            |
| <b>19</b> | HCC 78           | RPMI-1640          | 10%             | growth medium (70%), FBS (20%),<br>DMSO (10%) | 1:2                   |

**Supplementary Table 2: NSCLC cell lines tested and their characteristics**

| Cell line | Oncogene/tumor suppressor mutation status |              |                        |              | Clinical annotation |                 |                           |
|-----------|-------------------------------------------|--------------|------------------------|--------------|---------------------|-----------------|---------------------------|
|           | KRAS                                      | KEAP1        | TP53                   | STK11        | Gender              | Smoking history | NSCLC histology           |
| HCC827    | WT                                        | WT           | V218 in-frame deletion | WT           | Female              | Unknown         | Adenocarcinoma            |
| H1975     | WT                                        | WT           | WT                     | WT           | Female              | Non-smoker      | Adenocarcinoma            |
| H2228     | WT                                        | WT           | Q331X*                 | WT           | Female              | Non-smoker      | Adenocarcinoma            |
| HCC78     | WT                                        | WT           | S241F                  | WT           | Male                | Unknown         | Adenocarcinoma            |
| LC-2/ad   | NA                                        | WT           | Unknown                | WT           | Female              | Unknown         | Adenocarcinoma            |
| A549      | G12S                                      | G333C        | WT                     | p.Q37*       | Male                | Unknown         | Adenocarcinoma            |
| H23       | G12C                                      | Q193H        | M153I                  | p.W332*      | Male                | Unknown         | Adenocarcinoma            |
| H460      | Q61H                                      | D236H        | WT                     | p.Q37*       | Male                | Unknown         | Large cell lung carcinoma |
| H1435     | WT                                        | R413L        | WT                     | p.S299F      | Female              | Non-smoker      | Adenocarcinoma            |
| H1648     | WT                                        | G364C, G430C | WT                     | WT           | Male                | Smoker          | Adenocarcinoma            |
| H520      | WT                                        | WT           | W146X                  | WT           | Male                | Unknown         | Squamous Cell Carcinoma   |
| H1573     | G12A                                      | A143P        | R248L                  | p.S216F      | Female              | Smoker          | Adenocarcinoma            |
| H1793     | WT                                        | WT           | R209X                  | WT           | Female              | Non-smoker      | Adenocarcinoma            |
| H1944     | G13D                                      | R272L        | WT                     | p.K62N, K78N | Female              | Smoker          | Adenocarcinoma            |
| H1395     | WT                                        | WT           | WT                     | p.L55fs      | Female              | Smoker          | Adenocarcinoma            |
| H1838     | WT                                        | WT           | R273L                  | WT           | Female              | Non-smoker      | Adenocarcinoma            |
| H1703     | WT                                        | WT           | WT                     | WT           | Male                | Smoker          | Squamous Cell Carcinoma   |
| H1563     | WT                                        | WT           | WT                     | p.G242W      | Male                | Non-smoker      | Adenocarcinoma            |
| H1666     | WT                                        | WT           | WT                     | p.K235fs     | Female              | Non-smoker      | Adenocarcinoma            |

**Supplementary Table 3A: LP-184 IC50 data across different primary NSCLC cell lines used in this study**

| <b>NSCLC cell line</b> | <b>LP-184 IC50 [nM]</b> |
|------------------------|-------------------------|
| H2228                  | 45.83                   |
| H1944                  | 55.99                   |
| H1395                  | 107                     |
| H460                   | 117.7                   |
| H1975                  | 255.6                   |
| H23                    | 313.5                   |
| H1838                  | 322.5                   |
| H1793                  | 328.5                   |
| A549                   | 358.9                   |
| LC-2/ad                | 371                     |
| H1648                  | 464.5                   |
| HCC827                 | 655.8                   |
| H1573                  | 716.5                   |
| H1563                  | 727.3                   |
| H1666                  | 831.6                   |
| H1435                  | 859.1                   |
| H1703                  | 1009                    |
| HCC78                  | 1499                    |
| H520                   | 1805                    |

**Supplementary Table 3B: LP-184 IC50 data across different brain metastasis models from primary NSCLC used in this study**

| <b>Brain metastasis cell line</b> | <b>LP-184 IC50 [nM]</b> |
|-----------------------------------|-------------------------|
| LXFA983 (2D, primary lung)        | 210                     |
| LXFE2478 (2D, primary lung)       | 611                     |
| LXFA983 (3D, primary lung)        | 88                      |
| LXFE2478 (3D, primary lung)       | 3209                    |

**Supplementary Table 4: IC50 data for approved drugs in selected NSCLC cell lines, obtained from the GDSC database**

| NSCLC Cell Line | IC50 [nM]   |             |            |            |             |
|-----------------|-------------|-------------|------------|------------|-------------|
|                 | Oxaliplatin | Cisplatin   | Pemetrexed | Paclitaxel | Gemcitabine |
| H2228           | 93243.08    | 18301       | 39405      | 188        | 433.182     |
| H1944           | 47390.532   | 79386.377   | 24282      | 1378       | 136.49      |
| H1975           | 64369.499   | 244733.098  | 40570      | 47         | 493.797     |
| H23             | 36268.15    | 7143.533    | 15984      | 403        | 50.644      |
| H1838           | 334366.881  | 477403.948  | 112010     | 4403       | 121240.315  |
| H1793           | 250239.641  | 1252986.995 | 182960     | 2486       | 7099.818    |
| H1648           | 5945.864    | 31453.527   | 69434      | 8          | 18034.068   |
| HCC827          | 60609.886   | 96136       | 28930      | 876        | 13999.247   |
| H1573           | 246195.481  | 470856.804  | 72372      | 1309       | 316283.811  |
| H1563           | 228445.286  | 379156.283  | 78578      | 1328       | 150020.452  |
| H1666           | 56355.149   | 509337.922  | 40363      | 1023       | 1575.582    |
| H1435           | 210403.18   | 98435.644   | 58806      | 596        | 11751.627   |
| H1703           | 42003.033   | 206242.091  | 56674      | 11         | 10.093      |
| HCC78           | 60279.719   | 70162       | 5558       | 351        | 11.112      |
| H520            | 34630.235   | 17796.818   | 8199       | 76         | 79.883      |

**Supplementary Table 5: IC50 data for LP-184 in other comparator cell lines**

| Non-target comparator cell line (tissue type) | LP-184 IC50 [nM] |
|-----------------------------------------------|------------------|
| CHRF 288-11 (megakaryocyte)                   | 8,800 (9)        |
| K562 (chronic myeloid leukemia)               | >10,000          |
| 8392 (B lymphocyte)                           | >100,000         |



**Supplementary Table 6: Tumor size in mm<sup>3</sup> by group**

| Group                      | Mouse     | Tumor Volume (mm <sup>3</sup> ) on Sampling Day |        |         |         |         |
|----------------------------|-----------|-------------------------------------------------|--------|---------|---------|---------|
|                            |           | 1                                               | 5      | 8       | 12      | 15      |
| <b>1. Vehicle control</b>  | <b>1</b>  | 380.70                                          | 951.67 | 1662.65 | 2588.60 | 3706.28 |
|                            | <b>2</b>  | 340.78                                          | 737.33 | 1096.85 | 1903.88 | 3054.58 |
|                            | <b>3</b>  | 208.74                                          | 392.67 | 492.72  | 650.25  | 905.91  |
|                            | <b>4</b>  | 164.71                                          | 217.33 | 428.97  | 589.82  | 746.30  |
|                            | <b>5</b>  | 111.25                                          | 314.41 | 579.78  | 794.98  | 1095.12 |
|                            | <b>6</b>  | 101.12                                          | 210.70 | 462.72  | 749.91  | 1372.88 |
|                            | <b>7</b>  | 221.39                                          | 303.75 | 576.00  | 801.43  | 784.16  |
|                            | <b>8</b>  | 157.12                                          | 213.56 | 530.00  | 792.76  | 1085.94 |
|                            | <b>9</b>  | 119.16                                          | 440.90 | 1169.62 | 2086.97 | 3072.00 |
|                            | <b>10</b> | 56.45                                           | 145.41 | 269.00  | 432.96  | 551.41  |
| <b>2. LP-184 (5 mg/kg)</b> | <b>1</b>  | 437.40                                          | 477.14 | 423.77  | 348.17  | 437.38  |
|                            | <b>2</b>  | 275.70                                          | 115.18 | 149.68  | 101.12  | 209.48  |
|                            | <b>3</b>  | 194.48                                          | 133.10 | 93.29   | 53.24   | 87.26   |
|                            | <b>4</b>  | 122.30                                          | 132.88 | 116.46  | 91.29   | 136.80  |
|                            | <b>5</b>  | 109.65                                          | 97.47  | 70.23   | 40.57   | 59.90   |
|                            | <b>6</b>  | 106.64                                          | 117.62 | 41.60   | 18.43   | 23.12   |
|                            | <b>7</b>  | 227.25                                          | 397.81 | 257.91  | 115.34  | 229.15  |
|                            | <b>8</b>  | 148.84                                          | 307.24 | 129.51  | 73.73   | 107.65  |
|                            | <b>9</b>  | 102.85                                          | 150.70 | 112.09  | 71.79   | 127.01  |
|                            | <b>10</b> | 95.85                                           | 163.85 | 106.17  | 111.60  | 198.45  |

**Supplementary Table 7: Mouse body weight in grams by group**

| Group               | Mouse | Body Weight (grams) on Sampling Day |      |      |      |      |
|---------------------|-------|-------------------------------------|------|------|------|------|
|                     |       | 1                                   | 5    | 8    | 12   | 15   |
| 1. Vehicle control  | 1     | 23.3                                | 23.6 | 23.4 | 24.3 | 24.2 |
|                     | 2     | 21.5                                | 21.4 | 20.6 | 22.0 | 22.5 |
|                     | 3     | 24.9                                | 24.8 | 24.2 | 24.9 | 25.0 |
|                     | 4     | 24.1                                | 23.9 | 22.4 | 23.0 | 23.8 |
|                     | 5     | 24.5                                | 24.6 | 24.5 | 25.1 | 25.0 |
|                     | 6     | 23.3                                | 22.2 | 21.0 | 22.3 | 22.7 |
|                     | 7     | 22.8                                | 22.2 | 22.7 | 22.9 | 22.8 |
|                     | 8     | 21.9                                | 20.4 | 20.9 | 21.2 | 20.9 |
|                     | 9     | 23.3                                | 21.7 | 23.1 | 23.5 | 24.3 |
|                     | 10    | 24.0                                | 22.5 | 23.4 | 23.1 | 22.9 |
| 2. LP-184 (5 mg/kg) | 1     | 22.6                                | 21.1 | 18.5 | 16.5 | 14.5 |
|                     | 2     | 18.3                                | 16.7 | 15.3 | 16.3 | 16.5 |
|                     | 3     | 22.3                                | 20.4 | 16.9 | 14.8 | 16.4 |
|                     | 4     | 24.3                                | 22.8 | 20.1 | 18.2 | 19.4 |
|                     | 5     | 25.4                                | 23.5 | 21.4 | 20.6 | 22.4 |
|                     | 6     | 22.5                                | 21.2 | 18.8 | 16.9 | 18.1 |
|                     | 7     | 21.5                                | 19.9 | 20.3 | 18.8 | 19.4 |
|                     | 8     | 27.0                                | 25.3 | 25.5 | 23.5 | 24.6 |
|                     | 9     | 26.1                                | 24.1 | 24.9 | 23.9 | 24.2 |
|                     | 10    | 22.8                                | 21.1 | 21.8 | 21.3 | 21.6 |

**Supplementary Table 8: Tumor volume data in Vehicle control vs. LP-184 at 5 mg/kg were processed for Two-Way ANOVA using Geisser-Greenhouse correction and Sidak's post hoc analysis for group comparisons**

| Day | Mean difference in tumor volume (mm <sup>3</sup> ) | Adjusted <i>p</i> value |
|-----|----------------------------------------------------|-------------------------|
| 1   | 4.05                                               | >0.9999                 |
| 5   | 183.5                                              | 0.2957                  |
| 8   | 576.8                                              | 0.0112                  |
| 12  | 1037                                               | 0.0091                  |
| 15  | 1476                                               | 0.0153                  |
